# Supplementary material
Source: PubMed Central journal article supplement (PMC4603750)

# Supplemental Figure 1

**a**

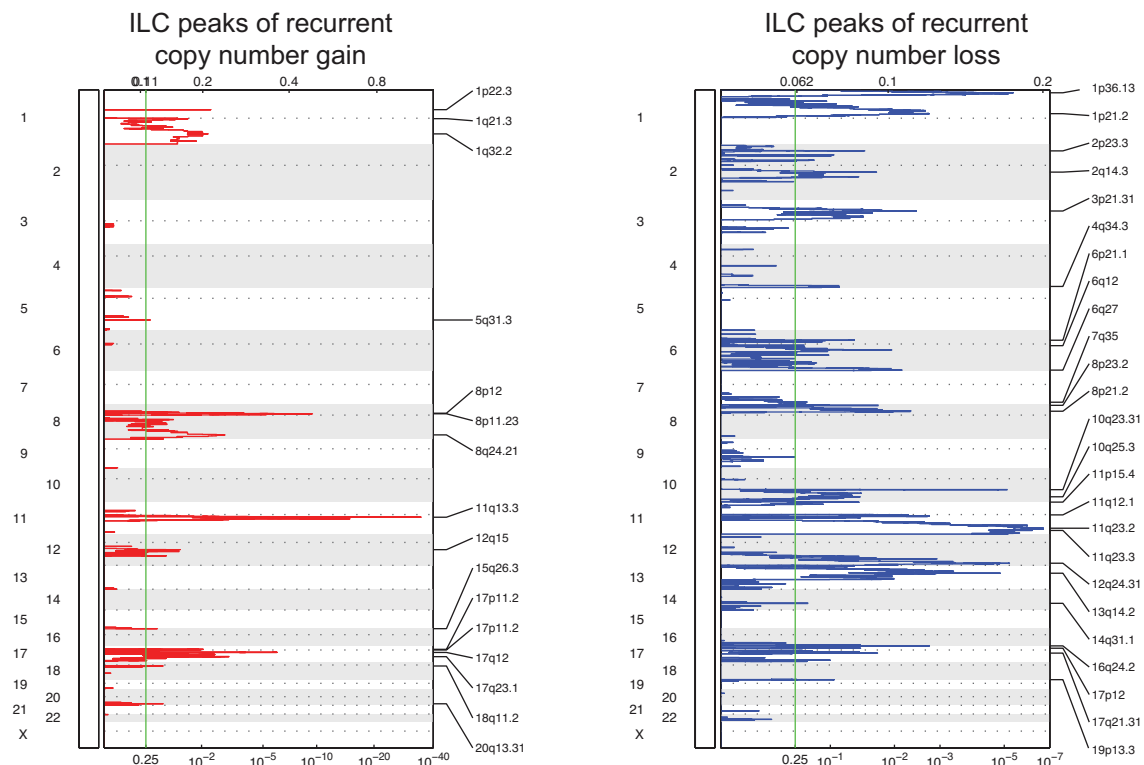

**Luminal A IDC peaks of recurrent copy number gain**

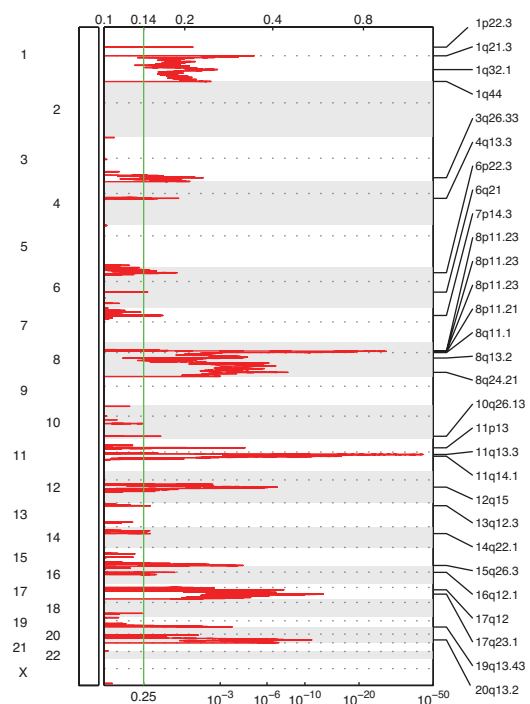

**Luminal A IDC peaks of recurrent copy number loss**

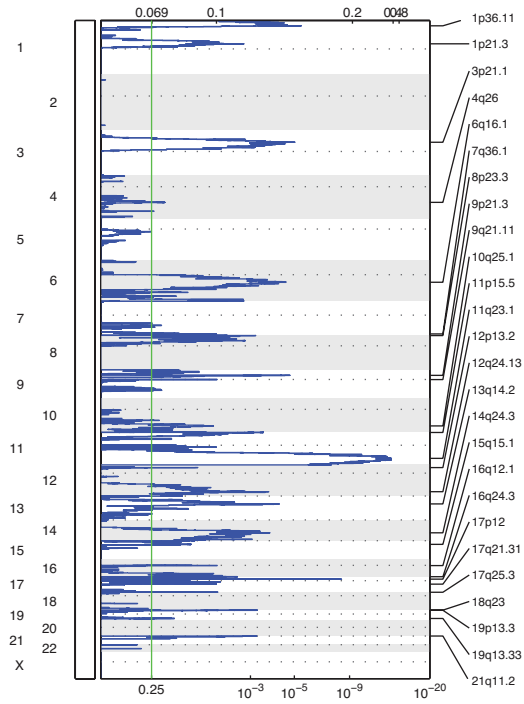

Supplement: NIHMS724218-supplement-3.pdf [file NIHMS724218-supplement-3.pdf]
