# Supplementary material
Source: PubMed Central journal article supplement (PMC4603750)

**a** CDH1 Expression in 817 Breast Cancer Cases

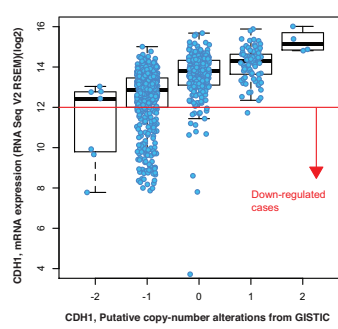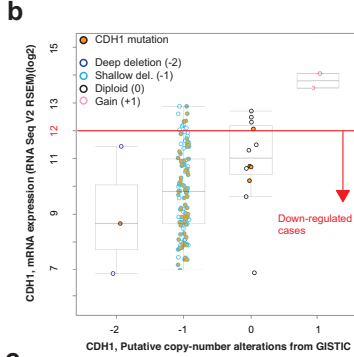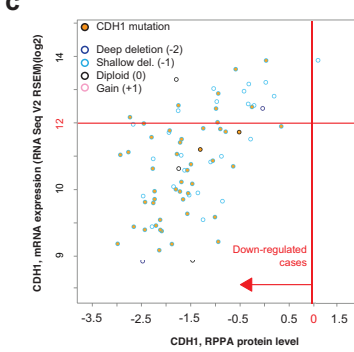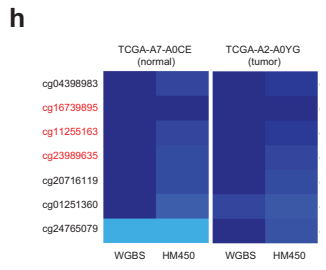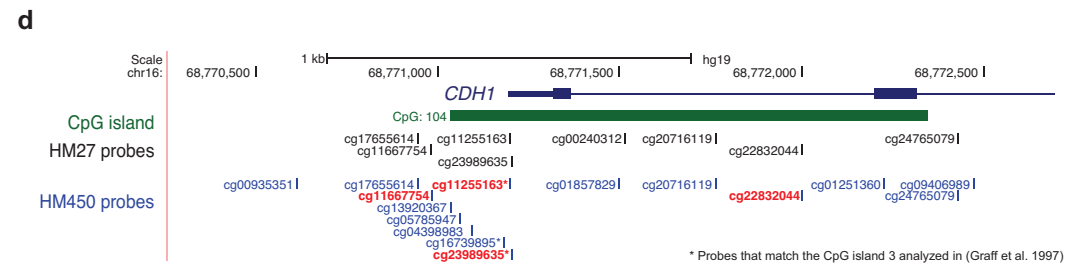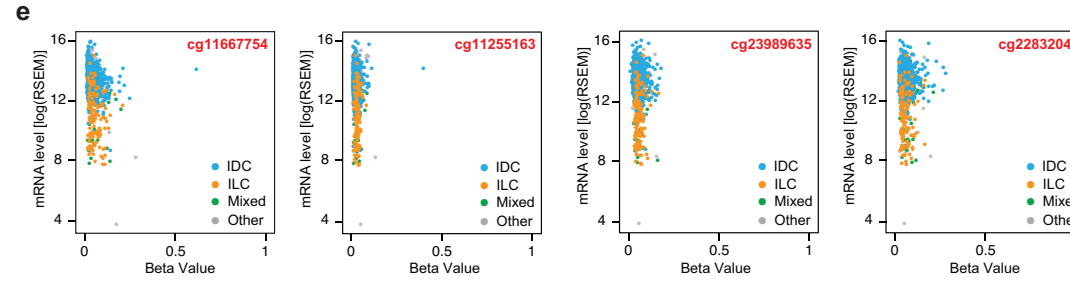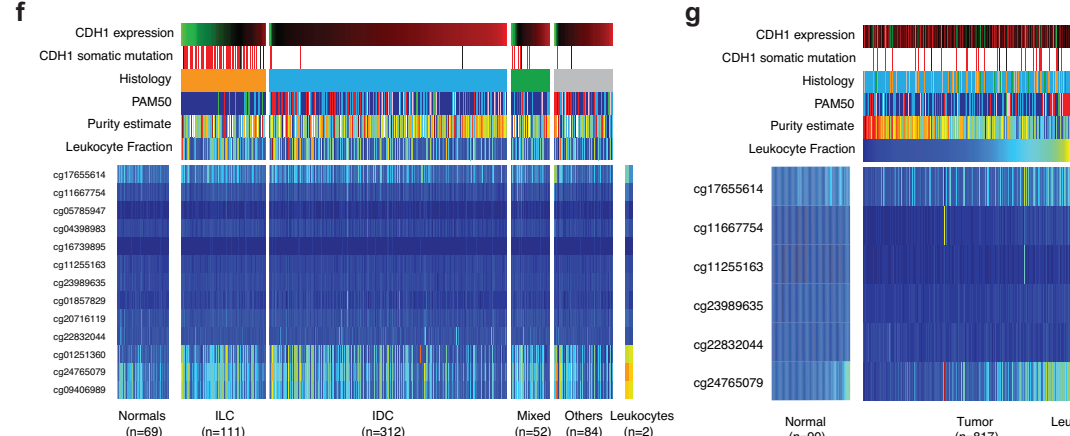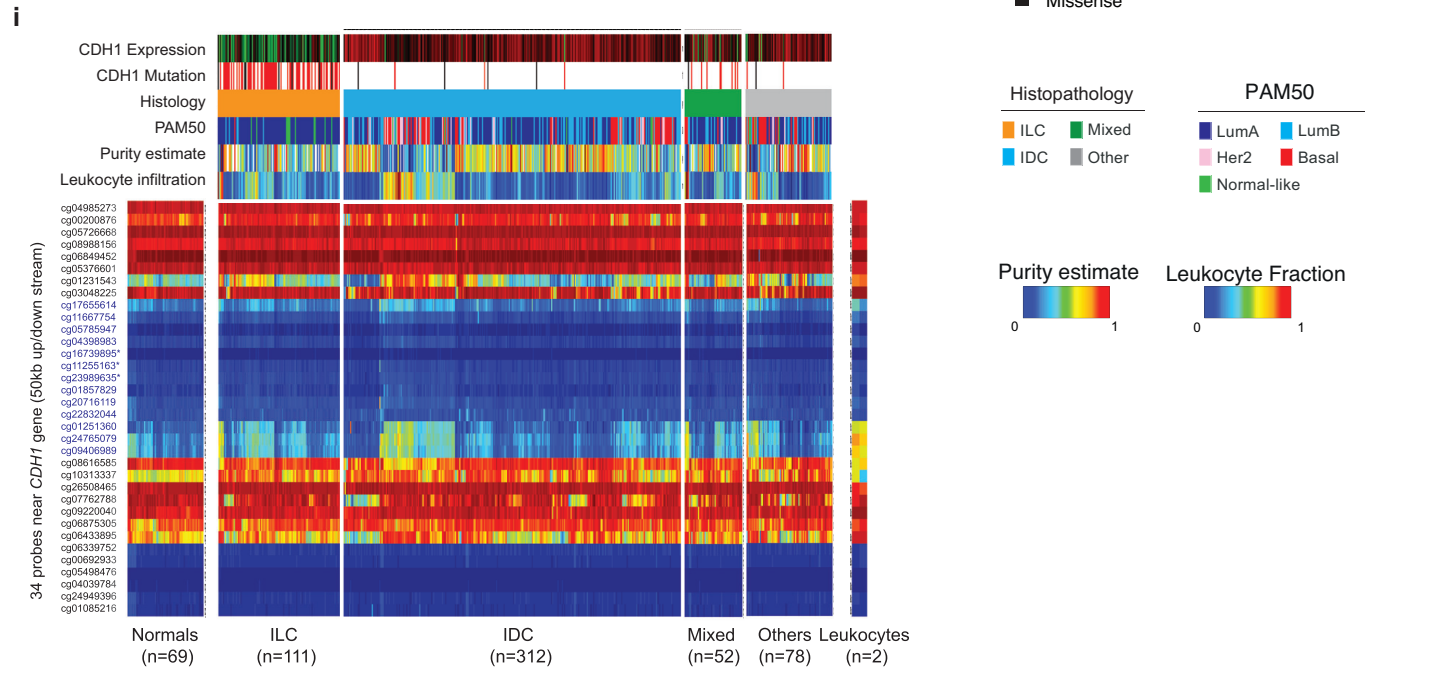

Supplement: NIHMS724218-supplement-4.pdf [file NIHMS724218-supplement-4.pdf]

# Supplemental Figure 3

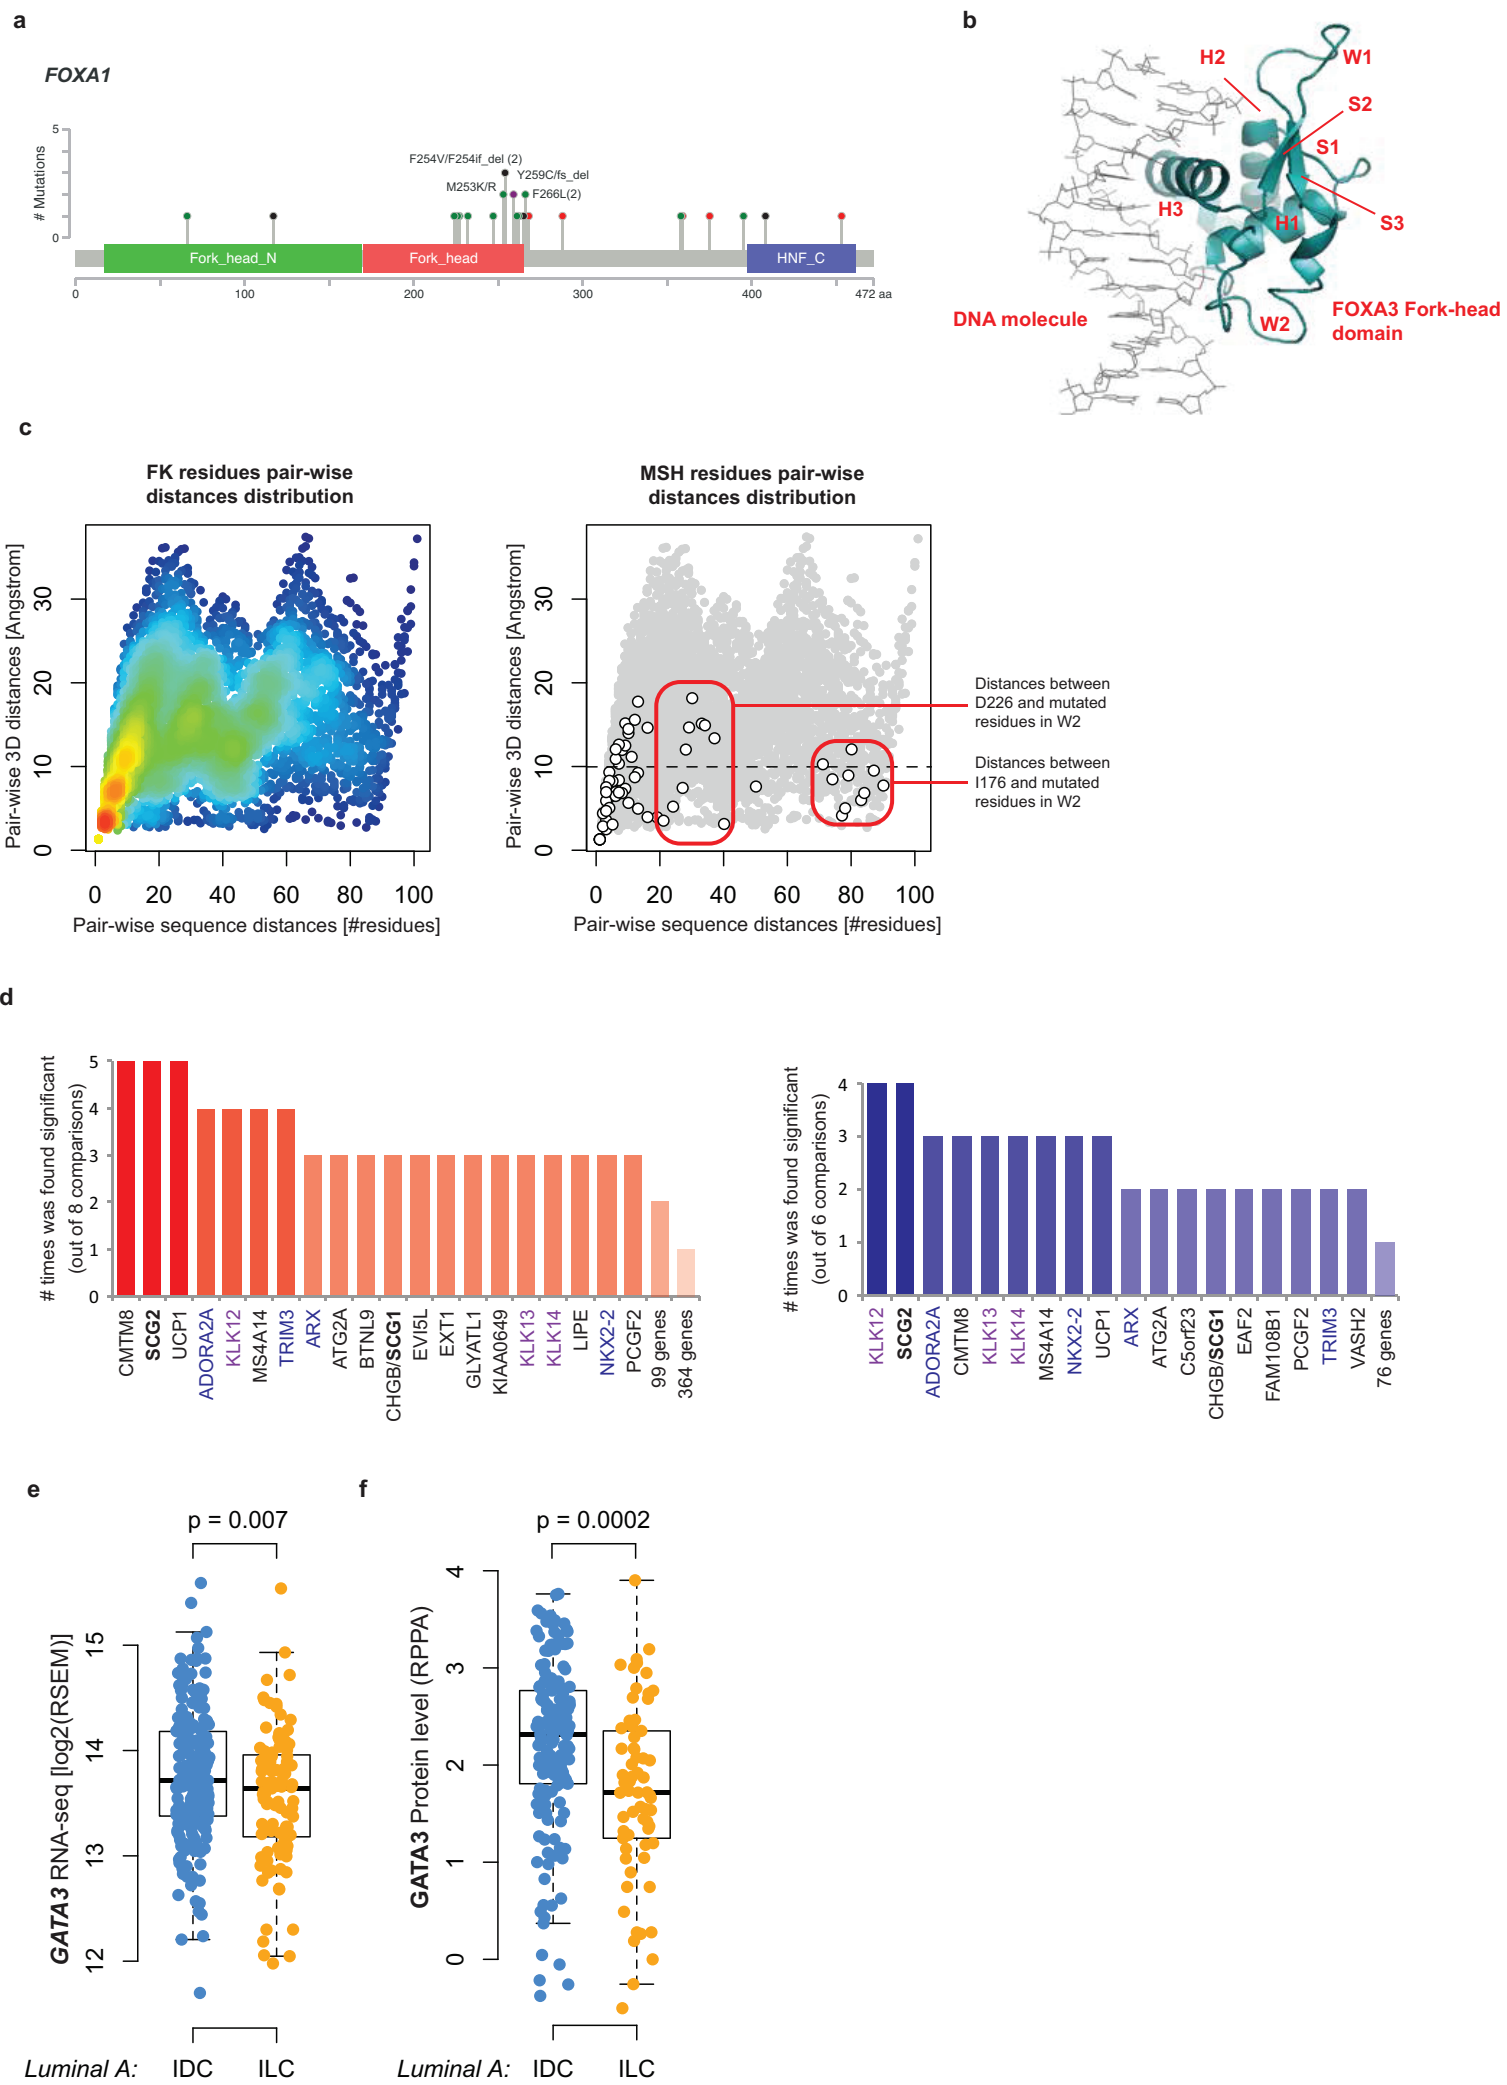

Supplement: NIHMS724218-supplement-5.pdf [file NIHMS724218-supplement-5.pdf]

# Supplemental Figure 4

**a**

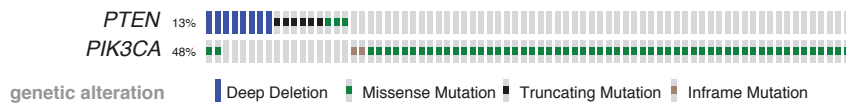

**b**

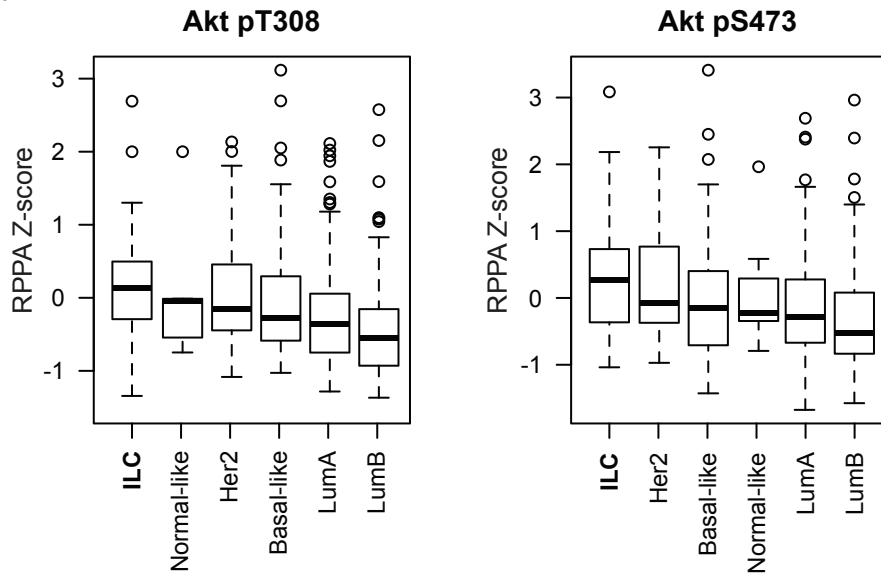

**c**

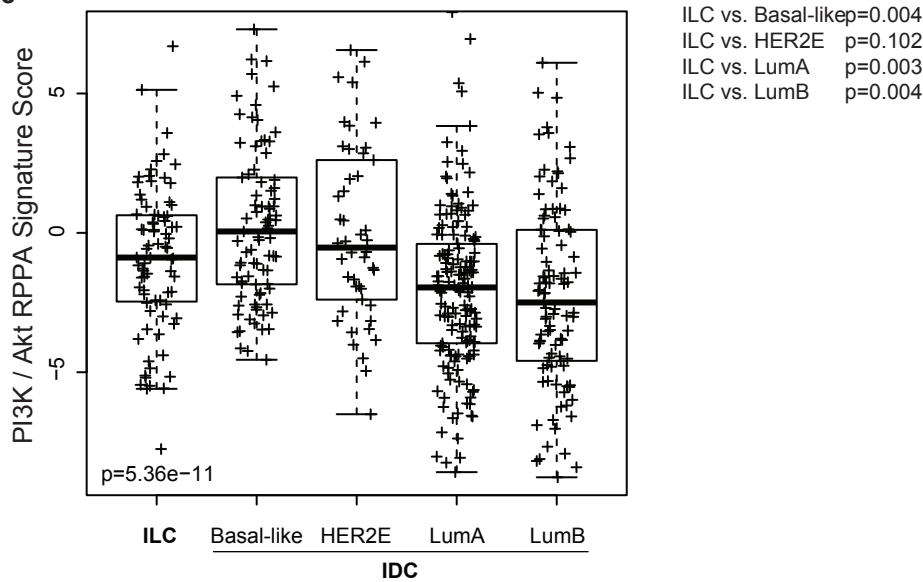

**d**

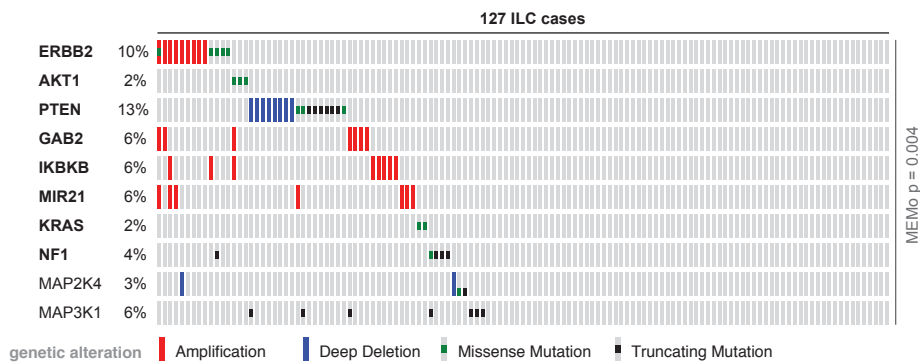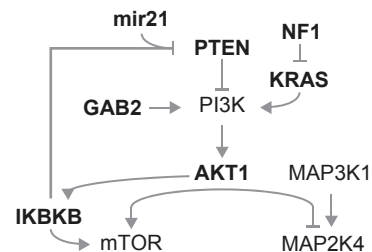

Supplement: NIHMS724218-supplement-6.pdf [file NIHMS724218-supplement-6.pdf]

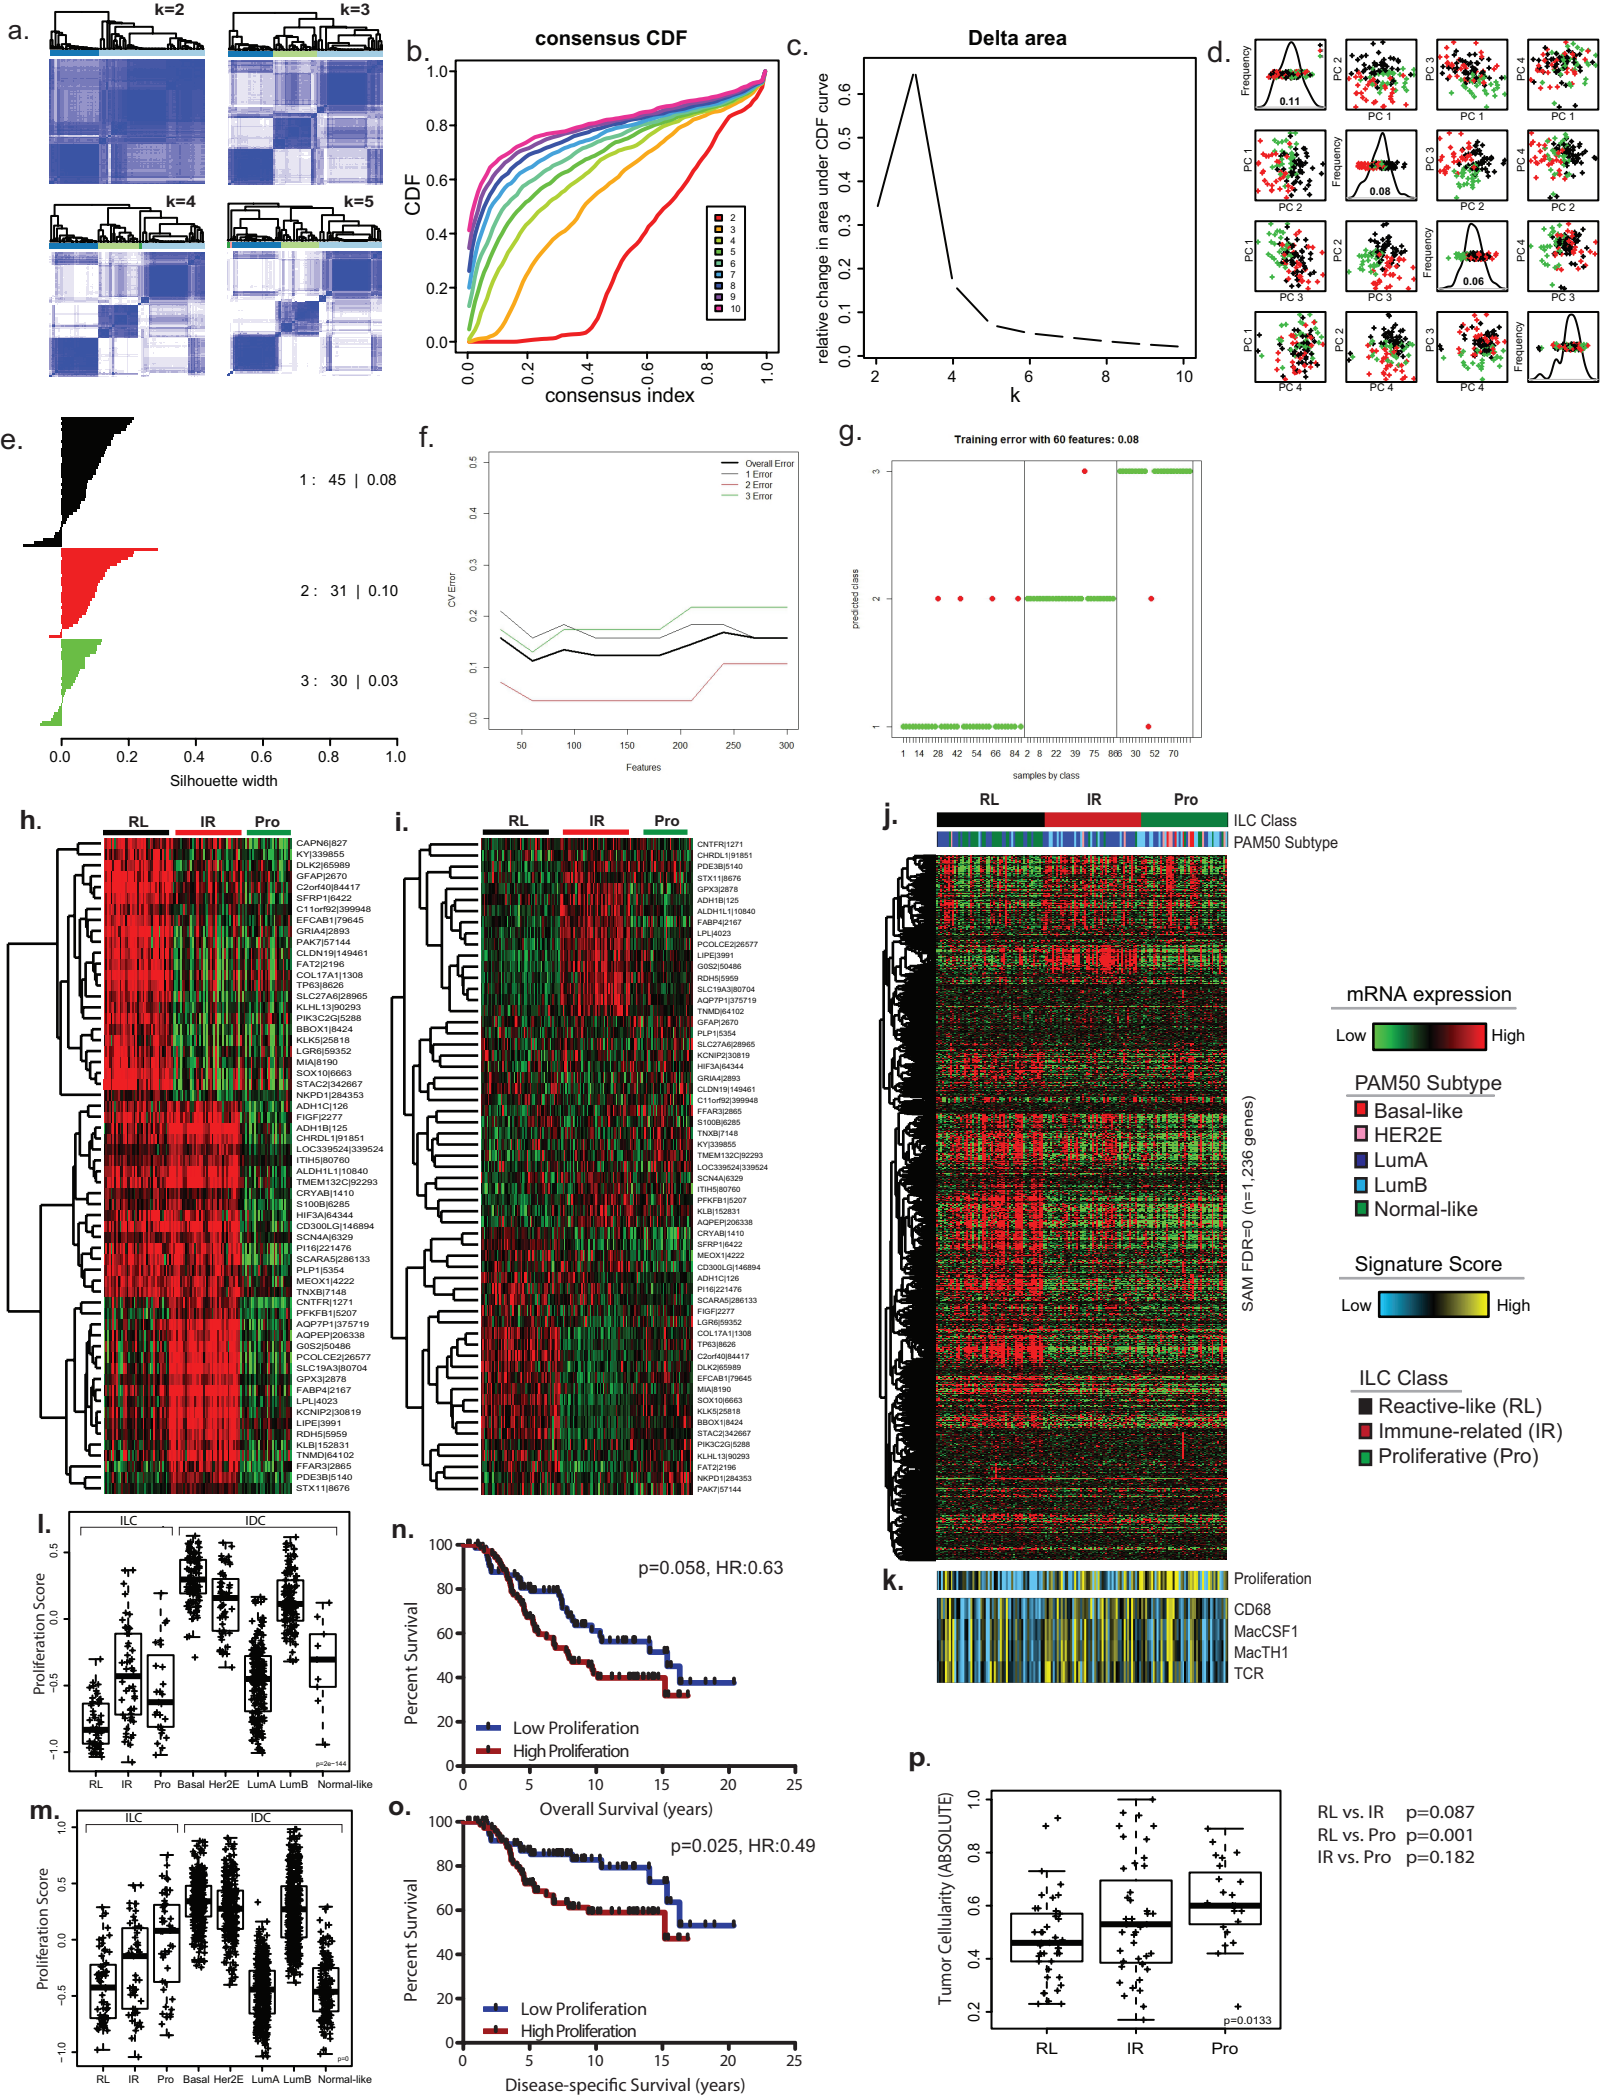

Supplement: NIHMS724218-supplement-7.pdf [file NIHMS724218-supplement-7.pdf]

# Supplemental Figure 6

**a**

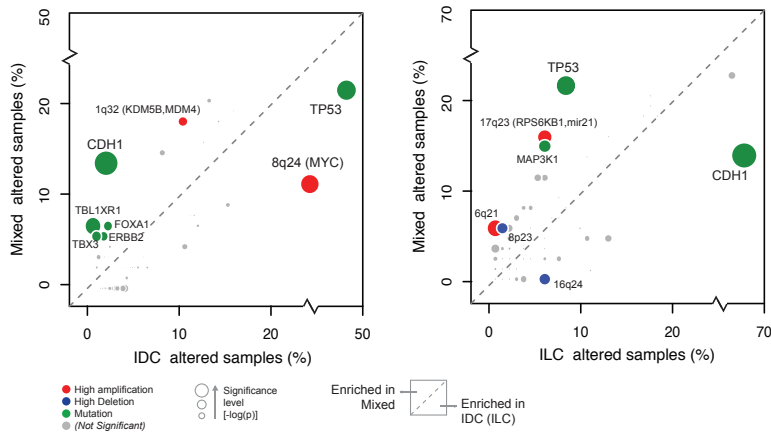

**b**

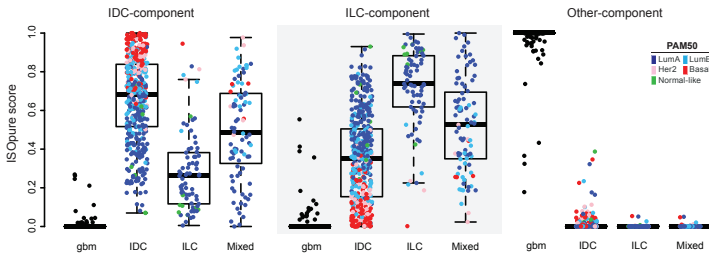

**c**

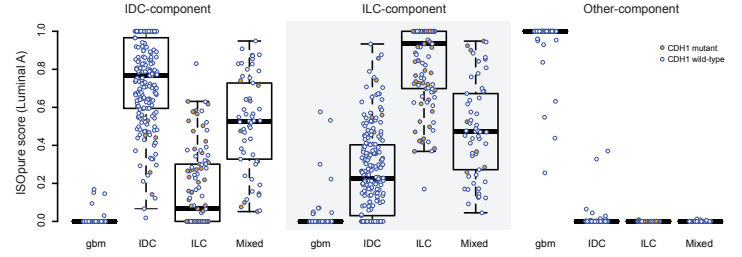

**d**

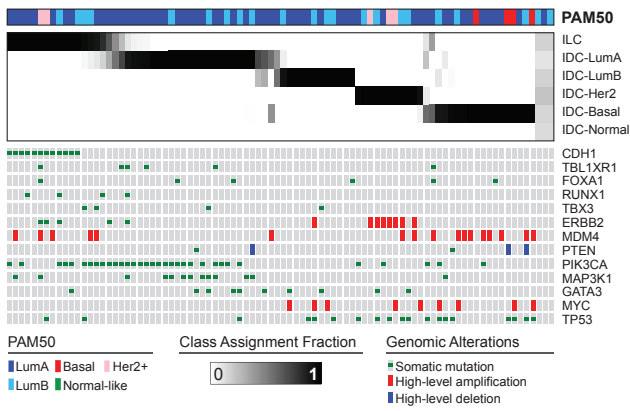

**e**

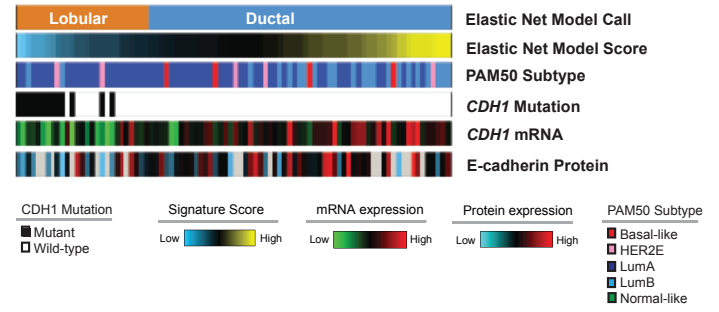

**f**

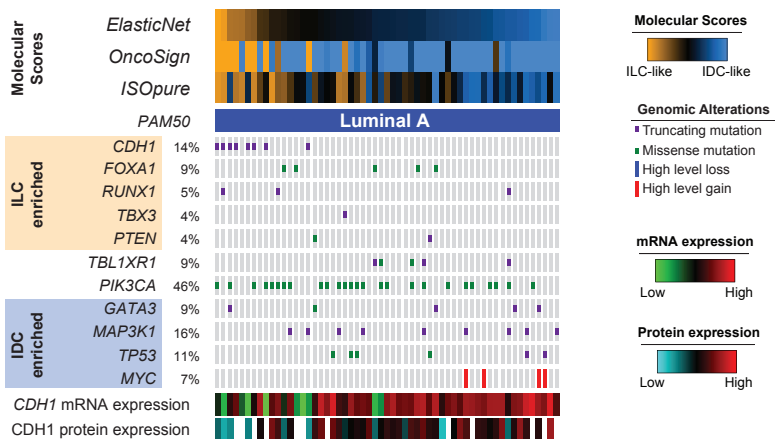

Supplement: NIHMS724218-supplement-8.pdf [file NIHMS724218-supplement-8.pdf]
